# Supplementary material for: Age-Dependent Decline in Neuron Growth Potential and Mitochondria Functions in Cortical Neurons
Source: MDPI journal article supplement (doi:10.3390/cells10071625), 2021-06-29
Supplement: s1 [file s1]

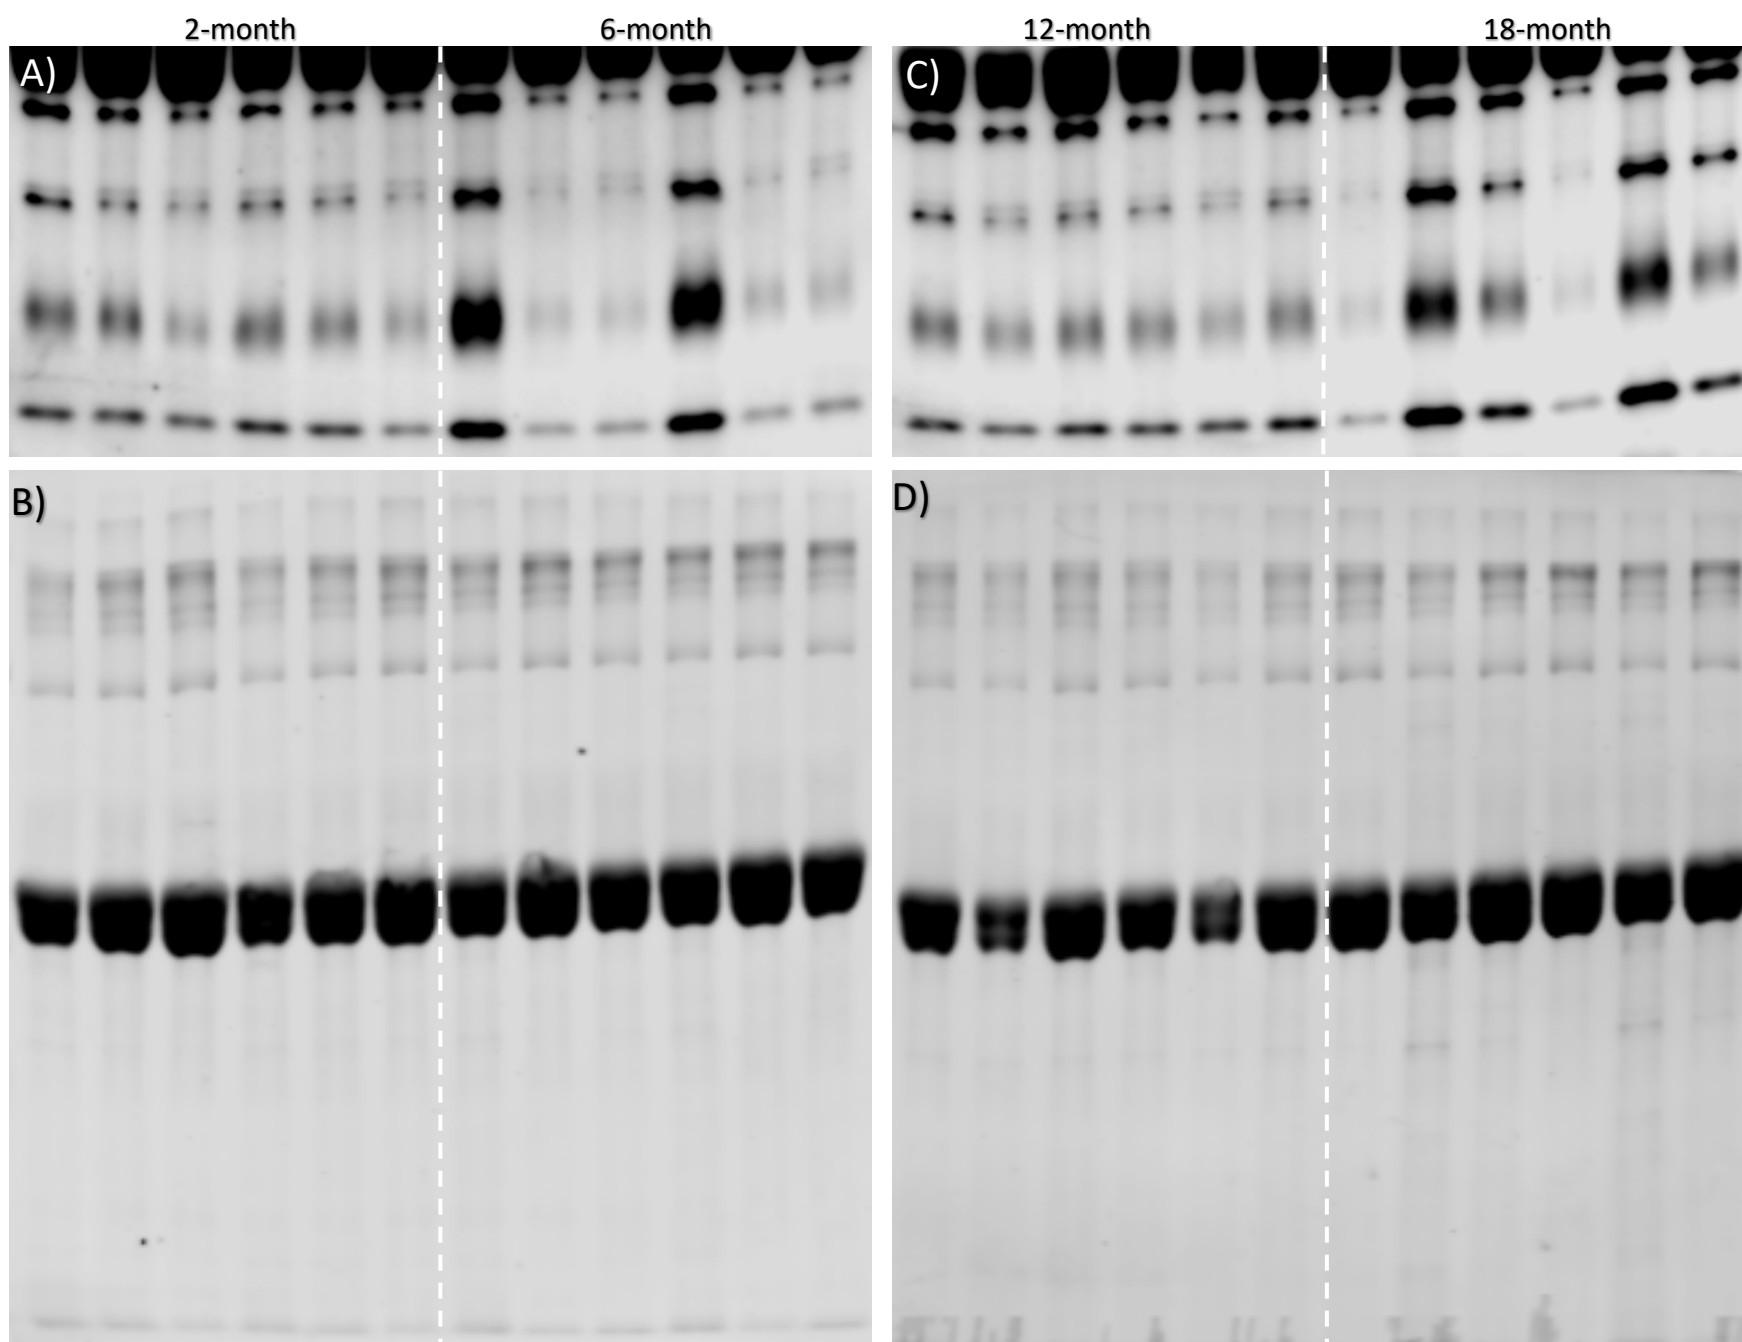

**Supplementary Figure 1. No significant change in the Mitochondrial OXPHOS Complex protein expression in cortical neurons.** Representative Western Blots of A) young (2- and 6-month) and C) older (12- and 18-month) cortical neurons (N= 3 samples/age) in duplicate, with their corresponding total protein stains, (B) and (D) respectively.
